# Supplementary material
Source: Springer Nature journal article supplement (https://www.springermedizin.de/resource/supplementary/12991_2009_1026_MOESM3_ESM.pdf/9615608)

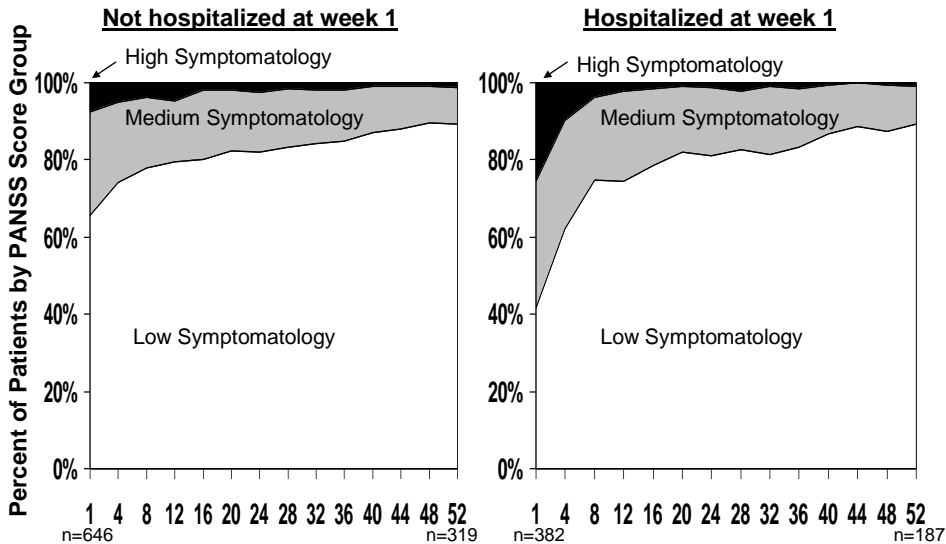

Week of open label study when PANSS was measured

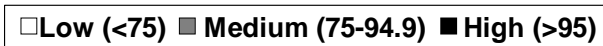

Supplement: MOESM3 [file 9615608]
